# Supplementary material for: Probiotic supplementation promotes a reduction in T‐cell activation, an increase in Th17 frequencies, and a recovery of intestinal epithelium integrity and mitochondrial morphology in ART‐treated HIV‐1‐positive patients
Source: PubMed Central journal article supplement (PMC5569369; doi:10.1002/iid3.160), 2017-04-20

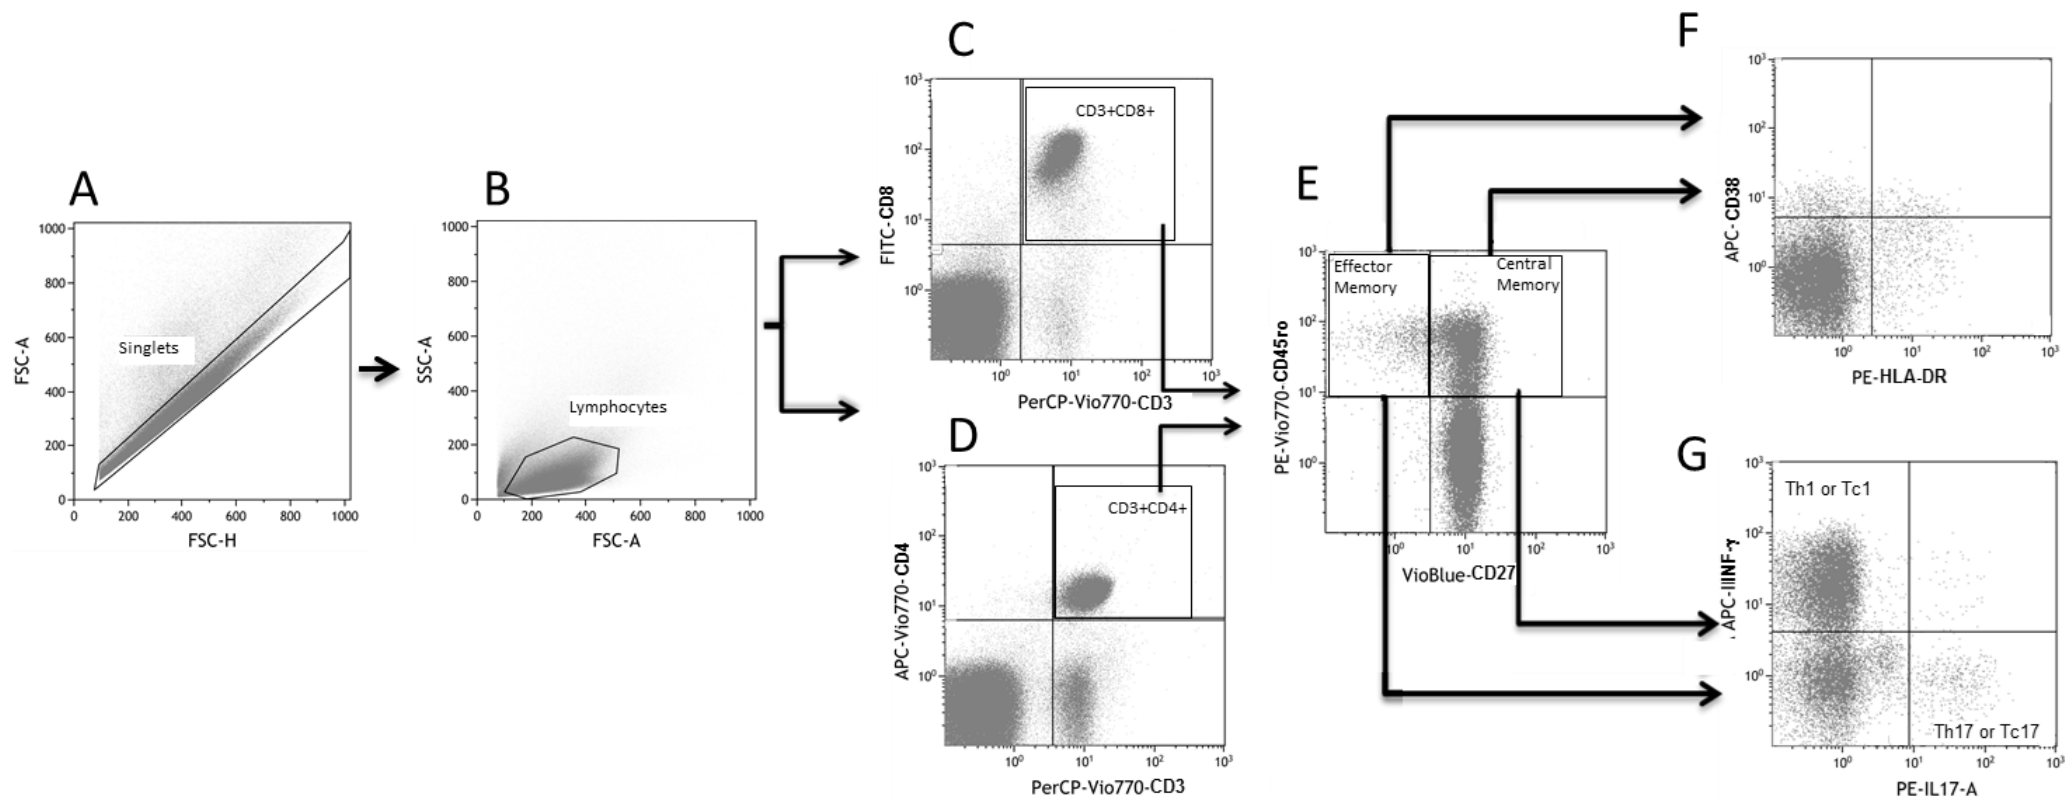

Supplement: IID3-5-244-s003.pdf [file IID3-5-244-s003.pdf]
